# Supplementary material for: High-throughput 3D screening for differentiation of hPSC-derived cell therapy candidates
Source: PubMed Central journal article supplement — Sci Adv. 2020 Aug 7;6(32):eaaz1457. doi: 10.1126/sciadv.aaz1457 (PMC7413735; doi:10.1126/sciadv.aaz1457), 2020-08-07
Supplement: aaz1457_SM.pdf [file aaz1457_SM.pdf]

[advances.sciencemag.org/cgi/content/full/6/32/eaaz1457/DC1](https://advances.sciencemag.org/cgi/content/full/6/32/eaaz1457/DC1)

Supplementary Materials for  
**High-throughput 3D screening for differentiation of hPSC-derived  
cell therapy candidates**

Riya Muckom, Xiaoping Bao, Eric Tran, Evelyn Chen, Abirami Murugappan,  
Jonathan S. Dordick, Douglas S. Clark\*, David V. Schaffer\*

\*Corresponding author. Email: [clark@berkeley.edu](mailto:clark@berkeley.edu) (D.S.C.); [schaffer@berkeley.edu](mailto:schaffer@berkeley.edu) (D.V.S.)

Published 7 August 2020, *Sci. Adv.* **6**, eaaz1457 (2020)  
DOI: 10.1126/sciadv.aaz1457

**The PDF file includes:**

Figs. S1 to S10  
Legends for movie S1  
Table S1

**Other Supplementary Material for this manuscript includes the following:**

(available at [advances.sciencemag.org/cgi/content/full/6/32/eaaz1457/DC1](https://advances.sciencemag.org/cgi/content/full/6/32/eaaz1457/DC1))

Movie S1

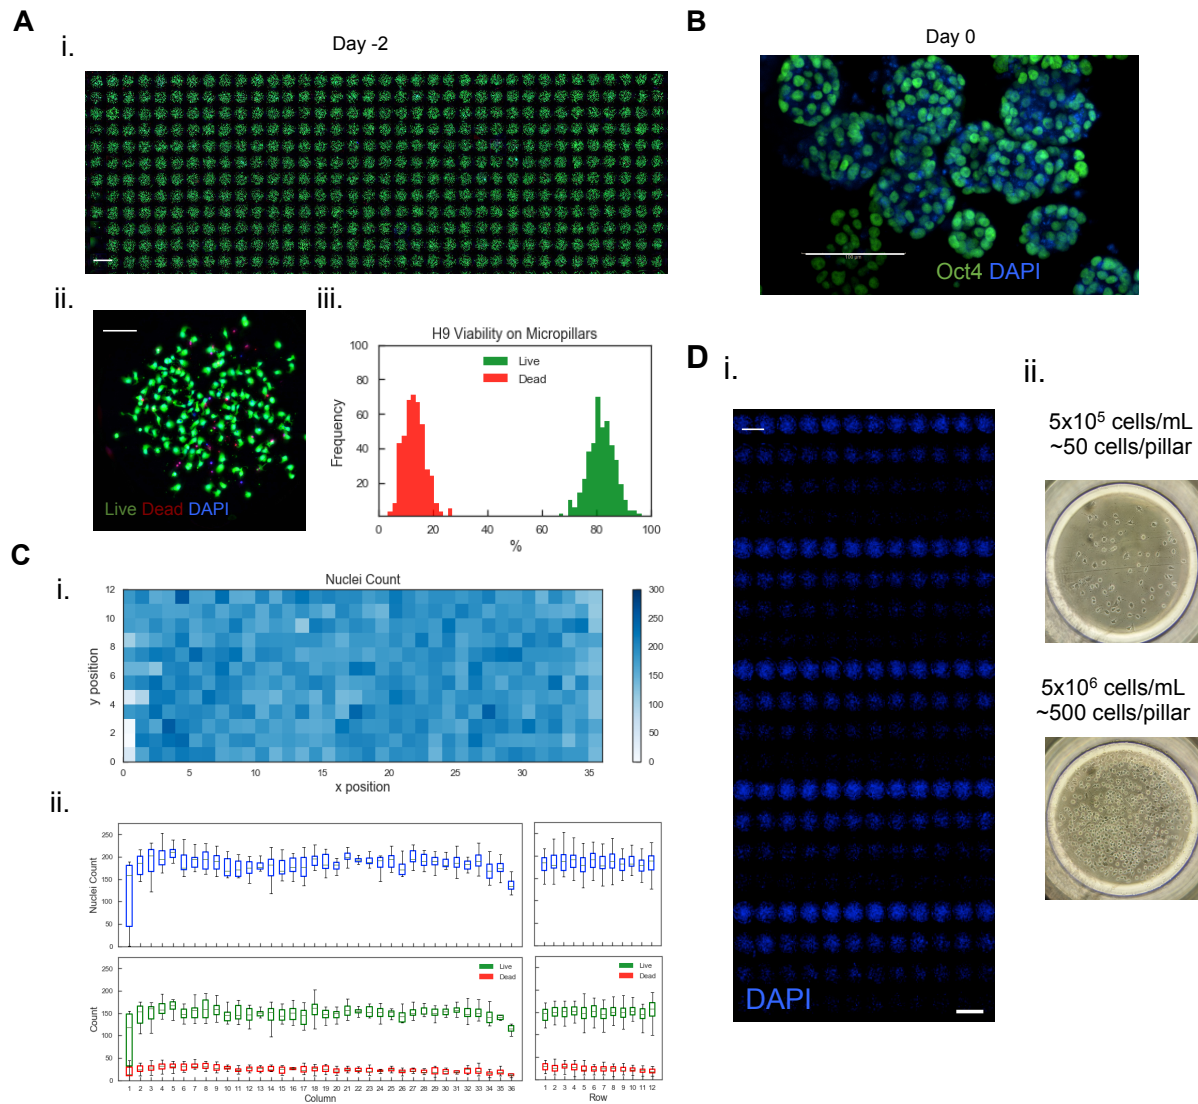

**Figure S1. H9 seeding, viability, and pluripotency on the micropillar culture chip.** A) i. Montage of 432 micropillar H9 culture environments stained with Hoechst (blue), calcein AM (green) and ethidium homodimer (red) to assess viability after the robotic dispensing process; scale bar represents 1 mm. ii. Image of a single microenvironment; scale bar represents 100 microns. iii. Histograms of percentage live and dead cells across the micropillar culture chip. B) Immunocytochemistry of 3D hPSC culture at Day 0 showing Oct4 (green) expression; scale bar represents 100 microns. C) i. Heatmap of total cell count across all positions on the micropillar culture chip. ii. Boxplots of i. total and ii. live/dead cell counts across every column and row of the micropillar chip. Scale bars represent 100 microns. D) i. Controlled modulation of seeding density of cells onto micropillars shown by fluorescence microscopy of Hoechst stained cells seeded at four different densities consistent across the micropillar chip; scale bar represents 100 microns. ii. Bright field images of micropillar cultures seeded at ii.  $5 \times 10^6$  cells/mL or roughly 500 cells per micropillar and  $5 \times 10^5$  cells/mL or roughly 50 cells per micropillar; pillar diameter is 750 microns.

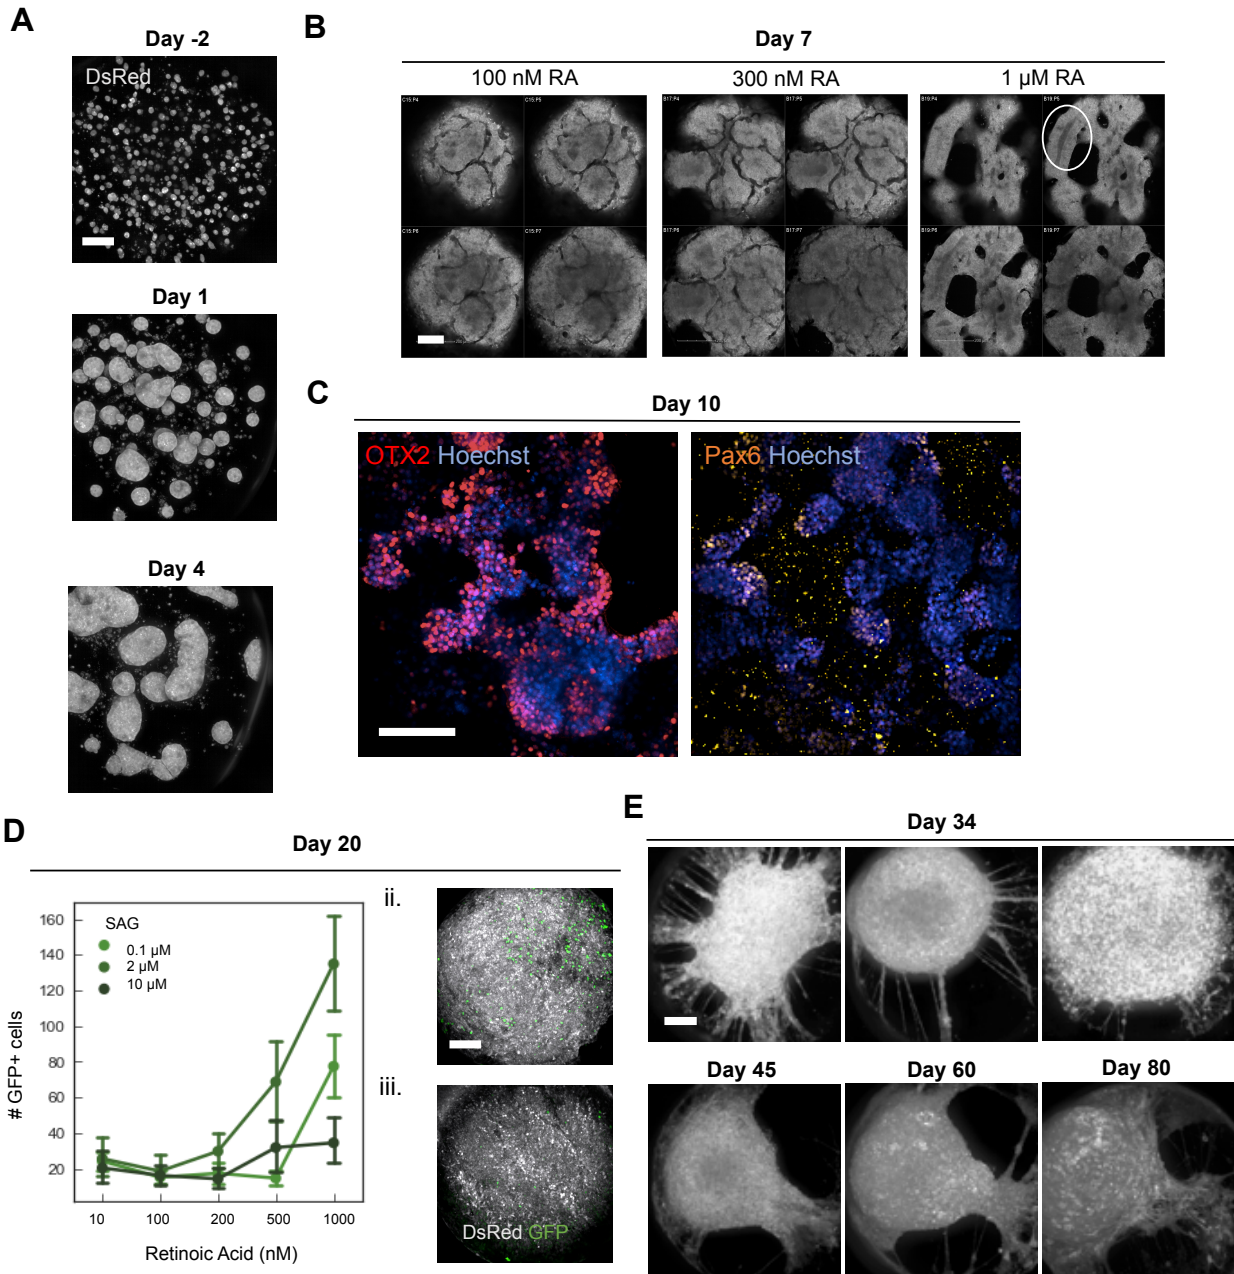

**Figure S2. Longitudinal study of proliferation and differentiation on micropillar platform.** A) Fluorescent confocal images of DsRed fluorescence from H9s cultured in 3D Matrigel from Day -2 to Day 4; scale bar represents 100 microns. B) Z-planes of 3D structures forming in the differentiating cultures at Day 7; scale bar represents 100 microns. C) OTX and Pax6 expression in differentiating cultures at Day 10; scale bar represents 100 microns. D) Quantification of GFP+ cells after 20 days of differentiation in 15 different combinations of RA and SAG concentrations with fluorescent confocal images of DsRed (gray) and GFP (green) at ii. 2  $\mu$ M SAG + 1000 nM RA and iii. 10  $\mu$ M SAG + 1000 nM RA conditions. Error bars represent 90% confidence interval from 4 technical replicates. E) Morphological changes into mature neural cells are visible by Day 34 and continue to develop beyond Day 45 to Day 80 of differentiation; scale bars represent 100 microns.

## Quantification of marker expression

Nuclear localized co-expression

Mixed nuclear/cytoplasmic co-expression

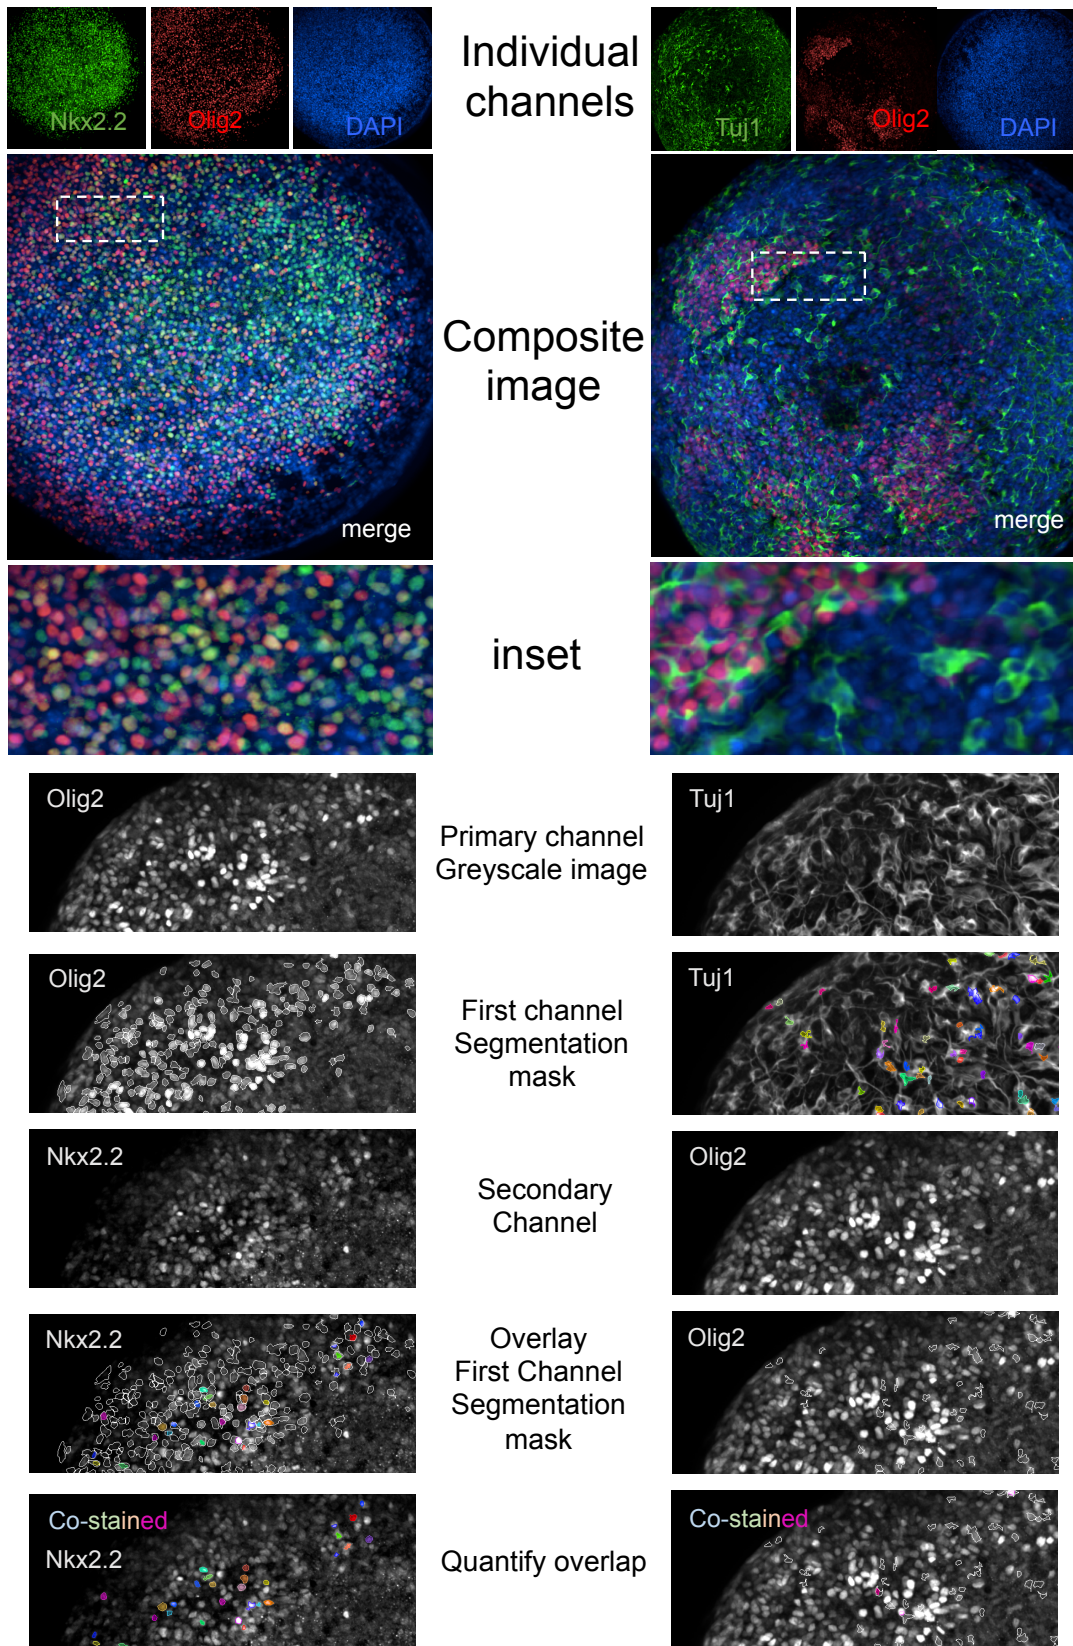

**Figure S3. Image analysis pipeline for quantification of nuclear and cytoplasmic cellular markers and co-expression.**

### 3-dimensional Image Scoring

The fluorescence microscopy readout used in this methodology is in the form of image data, which is commonly quantified by segmenting cells to score as positive or negative for marker expression. Dense cell populations can confound scoring methodology, which is further complicated if cellular markers are localized in the cytoplasm because of overlapping cell bodies. Therefore, if possible, it is advantageous to choose nuclear localized cell specific markers in the design of the screening experiment, such as Olig2 and Nkx2.2 expression for OPC differentiation. (Figure 3)

**A**

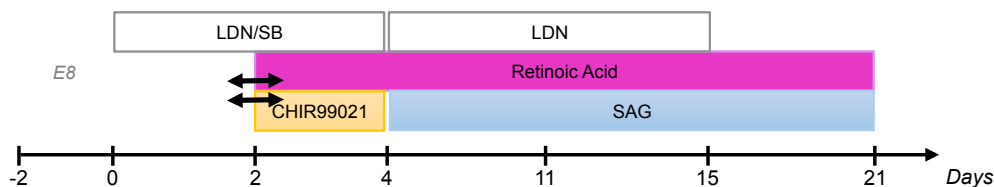

**B**

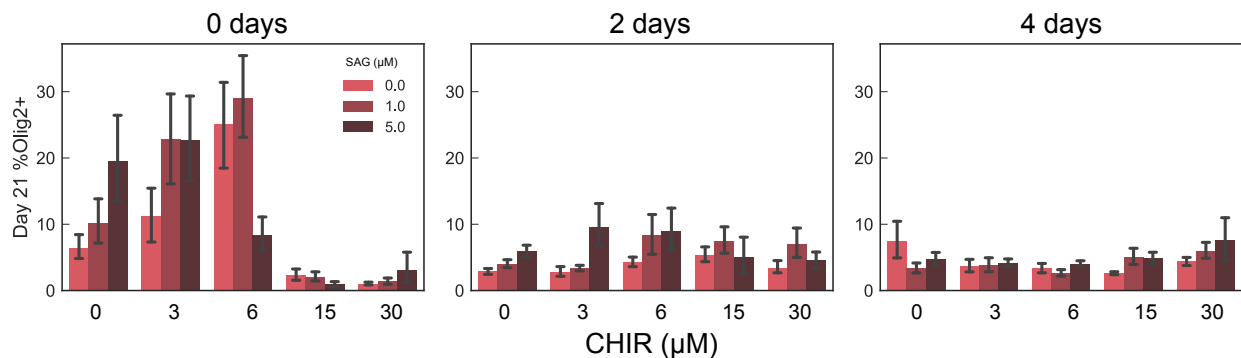

**Figure S4. Timing of addition of signaling cues during neural induction affects OPC differentiation efficiency.** A) Timeline of soluble signaling cues. B). Olig2+ cells at Day 21 in response to three different time points for addition of RA and CHIR, followed by SAG. Error bars represent 95% confidence intervals from 4 technical replicates.

### Toxicity Artifacts

The bi-phasic relationship of Olig2 expression with respect to SAG and CHIR dosing is a unique trend and the cause may be difficult to attribute to biological signaling phenomena alone because of the DMSO solvent. Broadly, the use of DMSO as a solvent for numerous small molecules is a technical limitation that may constrain the upper limit of dosing assays, especially combinatorial assays, as previous reports have identified toxicity of hPSCs to DMSO above 0.5%.<sup>(55)</sup> and we have seen toxic effects at and above 2% (Figure S5C). To somewhat mitigate this confounding effect, it may be necessary to concentrate stock solutions of all small molecules as high as the solubility limit will allow. (Figure S5C)

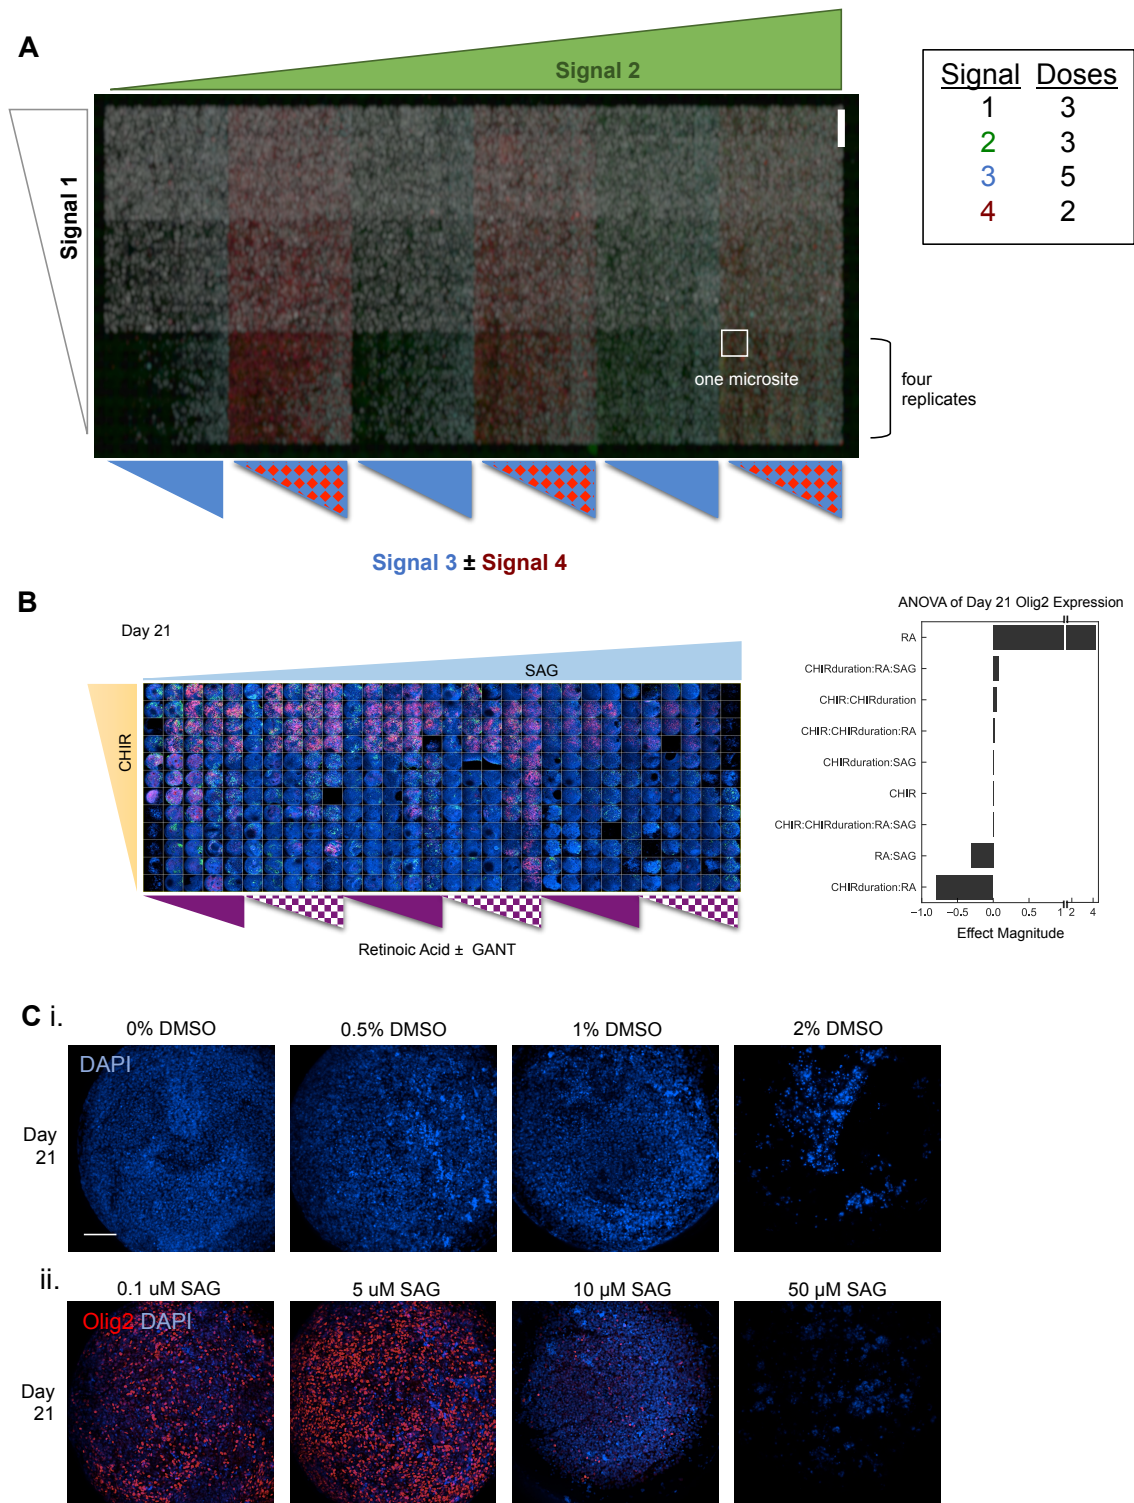

**Figure S5. Combinatorial liquid dispensing and DMSO and SAG dose responses.** A) Validation of liquid dispensing layout for full factorial combinatorial study. Full factorial design with  $n=4$  factors at a range of doses dispensed into the microwell chip validated by using fluorescent beads representing the identity and concentration of each factor. One chip contains 90 unique culture combinations with four technical replicates each, totaling 360 independent microsites. Scale bar represents 1 mm. B) ANOVA model of effect magnitude for all single and combined variables in the factorial experiment with RA, CHIR, and SAG. C) i. Dose response of DMSO at Day 21 of culture and ii. dose response of SAG at Day 21 of differentiation with Olig2 expression (red); scale bar represents 100 microns.

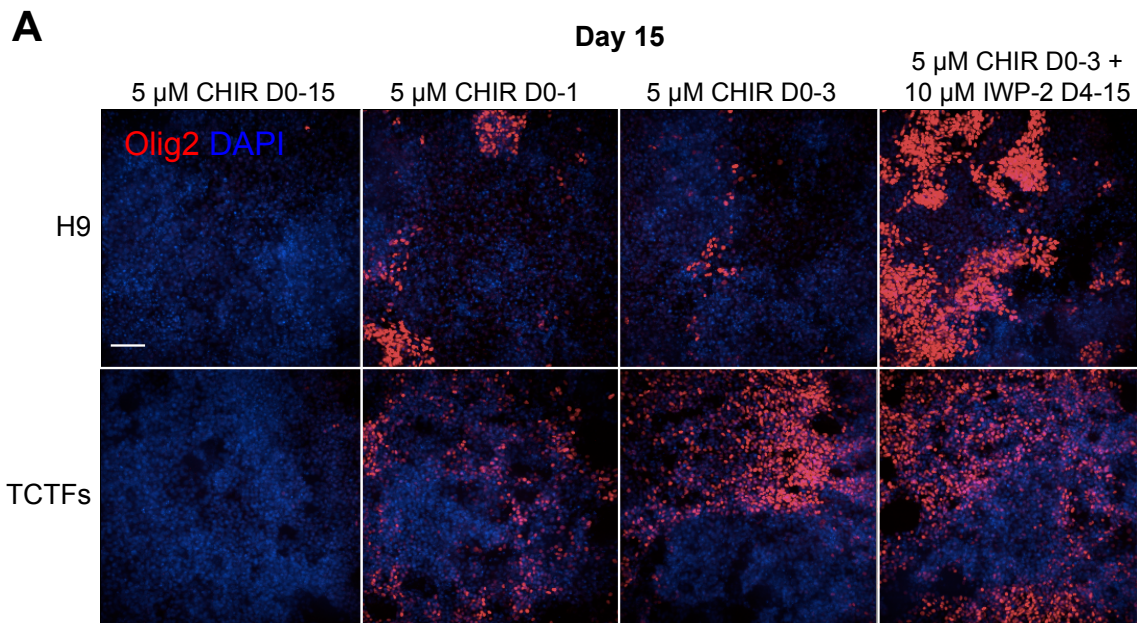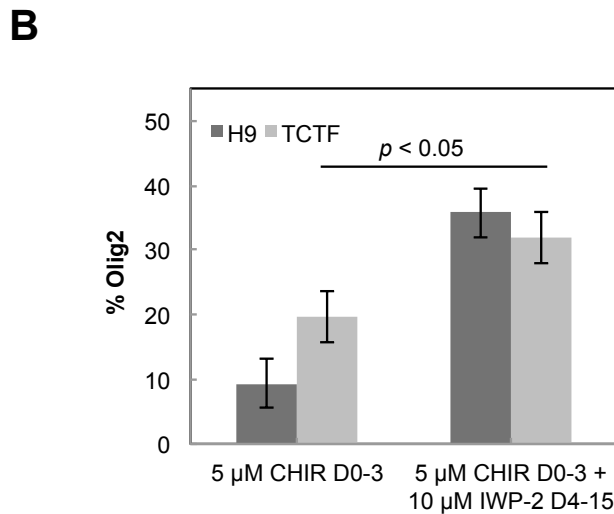

**Figure S6. Replication of biphasic Wnt effect on Olig2 expression across hPSC lines.** A) Olig2 expression at Day 15 across H9- and TCTF- derived OPCs in response to temporally changing Wnt signals (activated by small molecule agonist CHIR and inhibited by small molecule antagonist IWP-2) where Dx-y represents period of exposure, in days, to CHIR or IWP-2; scale bar represents 100 microns. B) Quantification of Olig2 expression; error bars represent 95% confidence intervals.

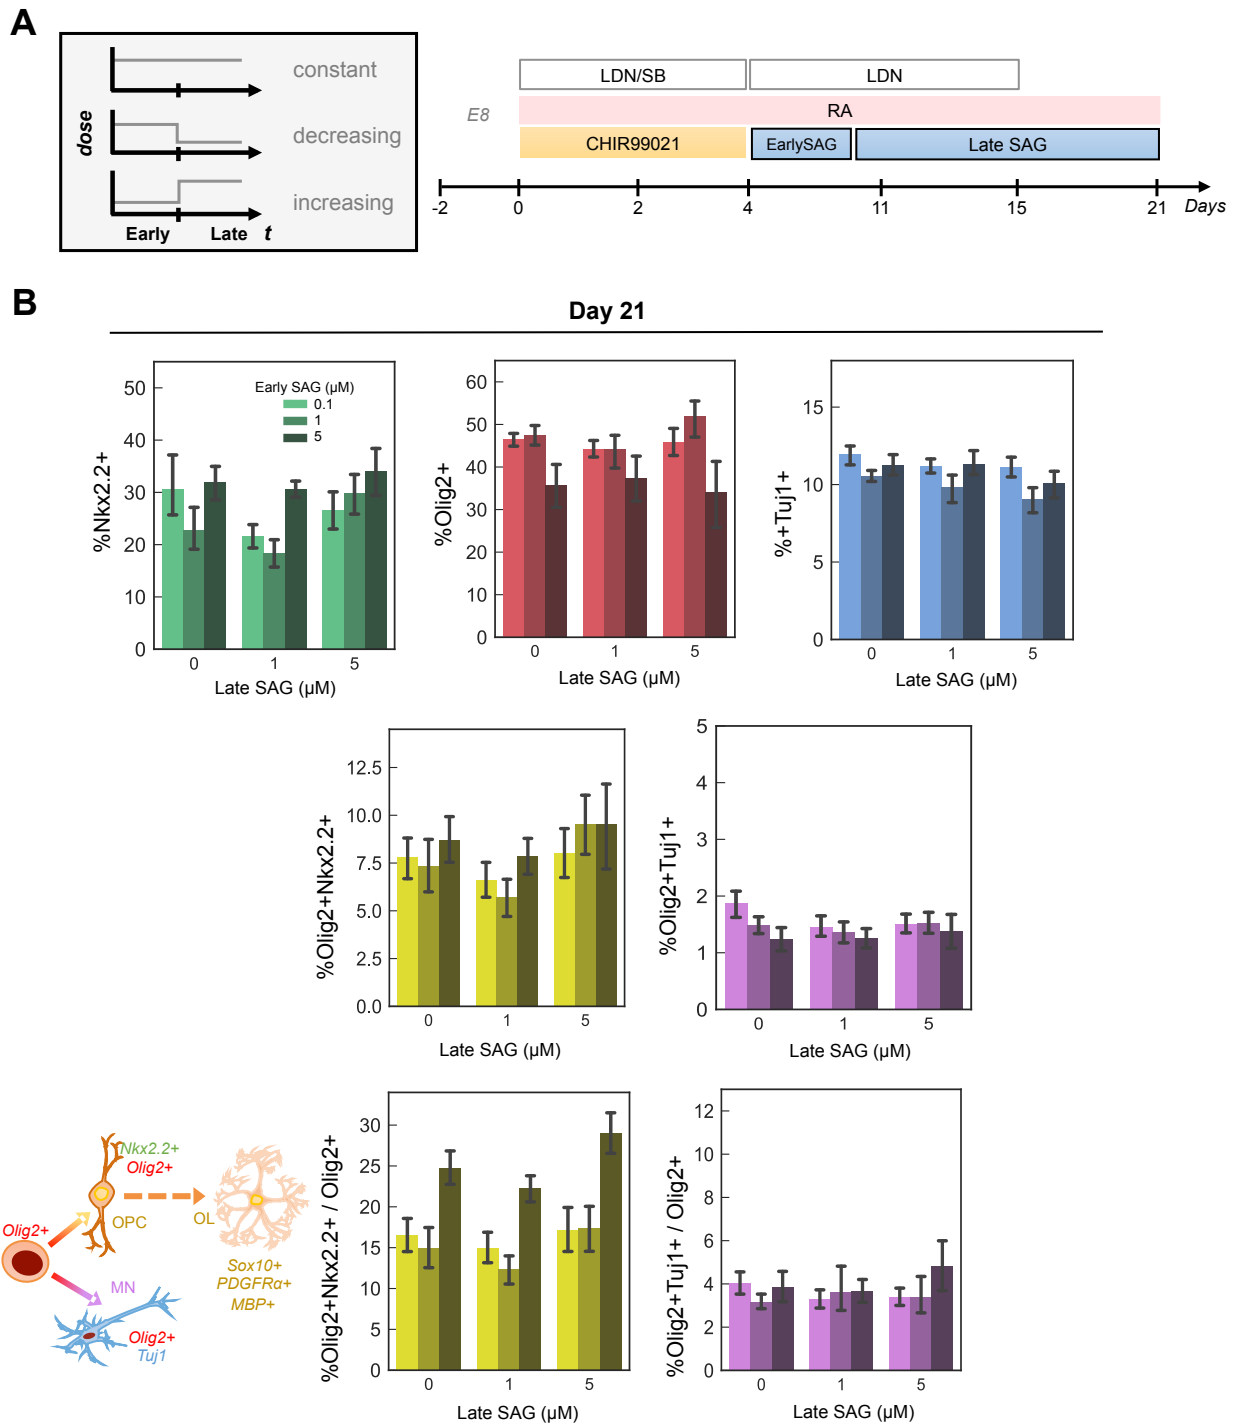

**Figure S7. Temporal profiles of SAG influence OPC specification.** A) Timeline of early and late windows for SAG exposure. B) Olig2+, Nkx2.2+, Tuj1+ and co-expression of markers in cells at Day 21 in response to time-varying doses of SAG. Error bars represent 95% confidence intervals from 4 technical replicates.

**A**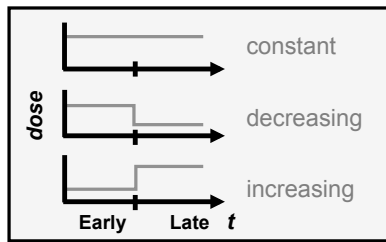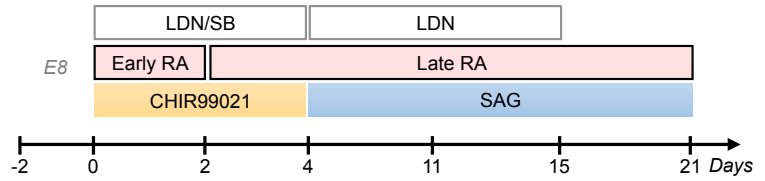**B**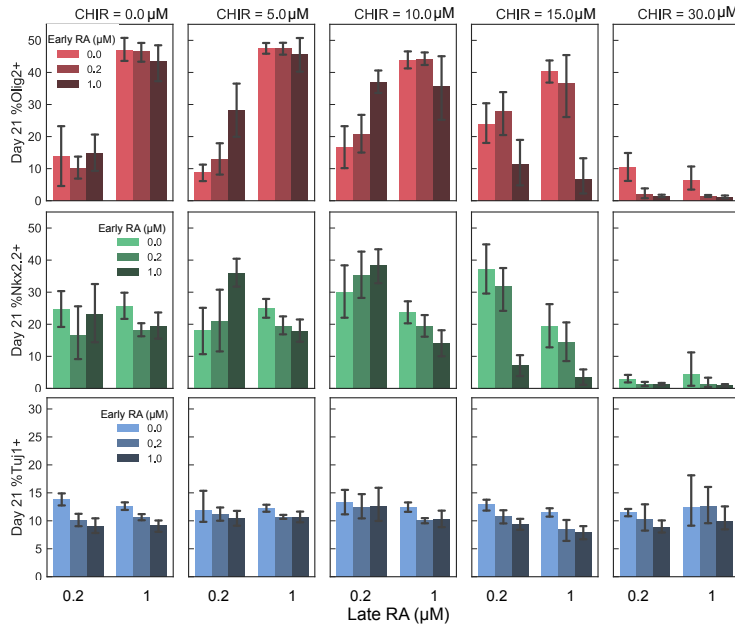**C**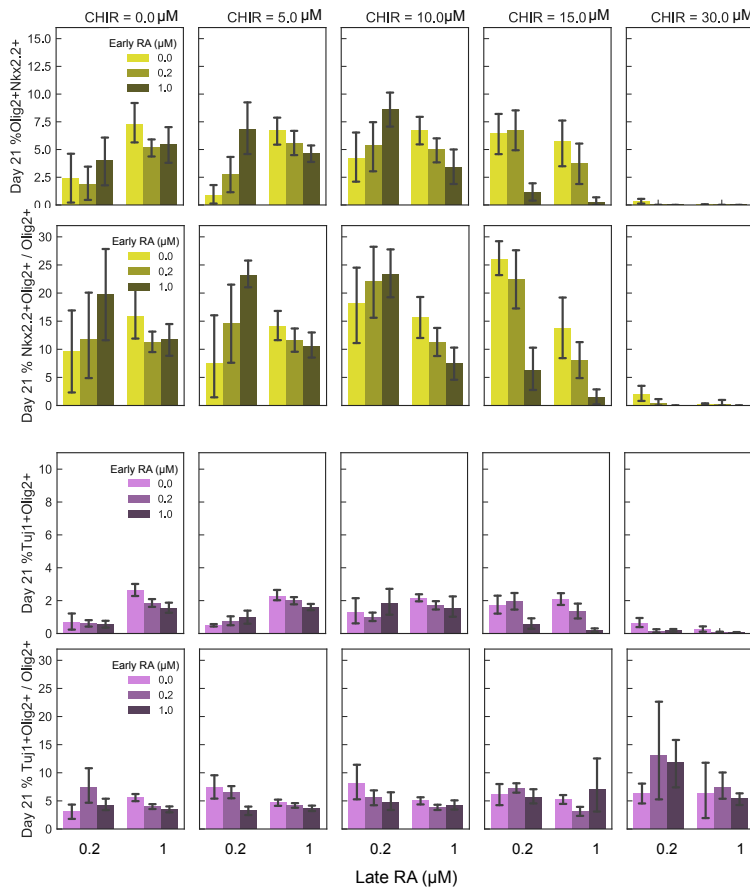

**Figure S8. Temporal profiles of RA influence OPC specification.** A) Timeline of early and late windows for RA exposure. B) Olig2+, Nkx2.2+, and Tuj1+ cells at Day 21 in response to time-varying doses of RA at different CHIR doses. Error bars represent 95% confidence intervals from 4 technical replicates. C) Co-expression of Olig2, Nkx2.2 and Tuj1 cells, and proportions of co-expressing cells within Olig2+ population, at Day 21 in response to time-varying doses of RA at different CHIR doses. Error bars represent 95% confidence intervals from 4 technical replicates.

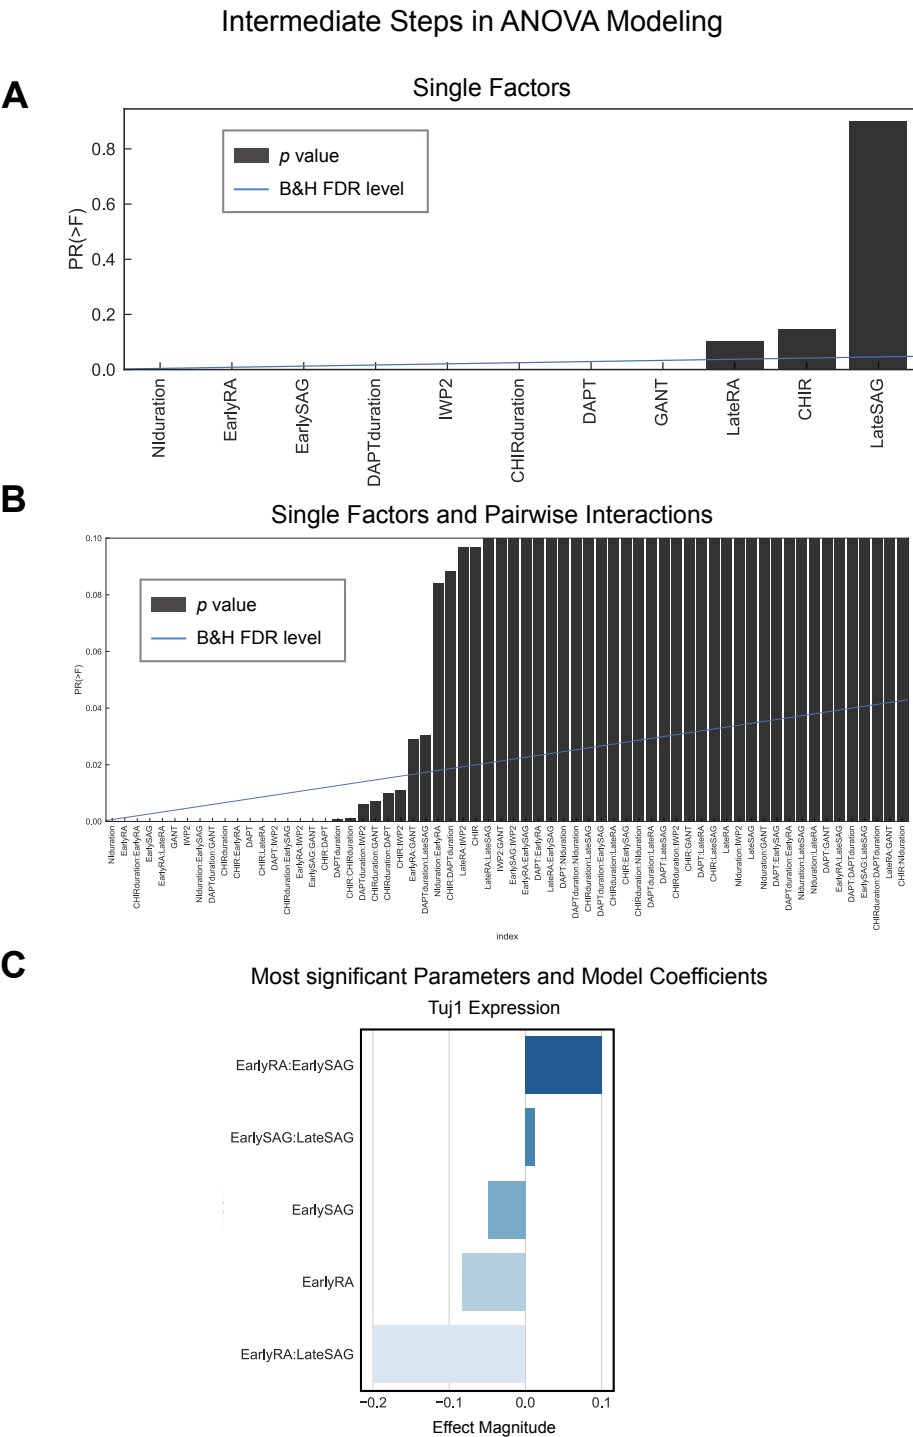

**Figure S9. Iterative process to improve Factorial ANOVA model.** A) Single factors ranked by their p-values with B&H False Discovery Rate correction. B) Single and pairwise interactions ranked by their p-values with B&H False Discovery Rate correction. C) Effect magnitude of statistically significant variables in the differentiation of Tuj1+ cells at Day 21.

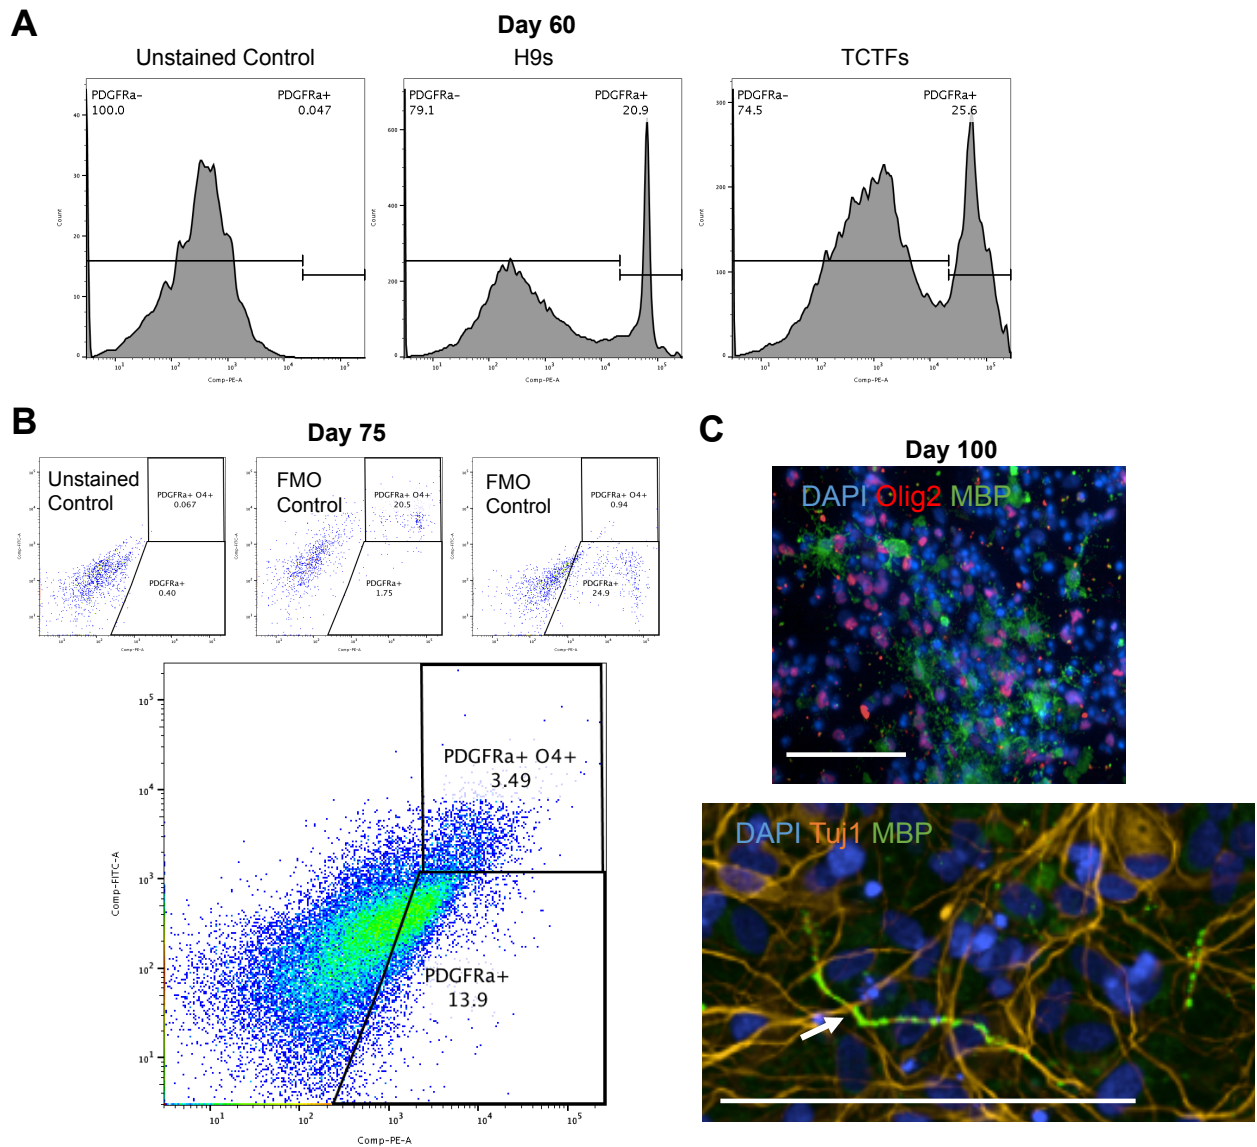

**Figure S10. Later stage assessment of OPC differentiation protocol built from screening data.** A) Flow cytometry indicating H9- and TCTF- derived OPCs express PDGFR $\alpha$  after 60 days of culture. B) Day 75 flow cytometry quantifying PDGFR $\alpha$ + and O4+ expressing cells compared to controls: unstained (top left), PDGFR $\alpha$ -PE (top middle) and O4-Alexa 488 (top right) negative controls. C) MBP+ cells after 100 days of differentiation and Tuj1 and MBP co-localization (white arrow); scale bars represents 100 microns.

**Movie S1. Z-scan of 3D hPSC neural differentiation on micro pillar at Day 15****Table S1. Reagent Details**

| <b>Cell Culture Reagents</b>    | <b>Concentration</b> | <b>Manufacturer, Cat. No</b> |
|---------------------------------|----------------------|------------------------------|
| Y-27632 (Rock Inhibitor)        | 10 $\mu$ M           | SelleckChem, S1049           |
| CHIR-99011                      | varied               | Tocris, 4423                 |
| Retinoic acid, all trans        | varied               | Enzo, BML-GR100-0500         |
| SAG dihydrochloride             | varied               | Xcessbio, M60081-2           |
| DAPT                            | varied               | SelleckChem, S2215           |
| IWP-2                           | varied               | Tocris, 3533                 |
| GANTT61                         | varied               | Enzo, ALX-270-482-M001       |
| IGF-1                           | 10 ng/mL             | Peprotech, 100-11            |
| PDGF-AA                         | 10 ng/mL             | Peprotech, 100-13A           |
| NT-3                            | 10 ng/mL             | Peprotech, 450-03            |
| Insulin                         | 25 $\mu$ g/mL        | Sigma, I2643                 |
| DMSO                            | 100%                 | Sigma, D2650-5X5ML           |
| Glutamax Supplement             | 1:100                | ThermoFisher, 35050061       |
| B27 supplement                  | 1:50                 | ThermoFisher, 17504-044      |
| N-2 Supplement                  | 1:50                 | Life Technologies, 17502-048 |
| Accutase Solution               | 100%                 | Life Technologies, A11105-01 |
| Versene Solution                | 100%                 | ThermoFisher, 15040066       |
| Essential-8 Media               | 100%                 | Life Technologies, A1517001  |
| DMEM-F12 + HEPES + L-Glutamine  | varied               | Life Technologies, 11039-047 |
| Neurobasal Media                | varied               | ThermoFisher, 10888022       |
| hESC-qualified Matrigel         | 50% (3D), 1% (2D)    | Corning, 354277              |
| Penicillin/Streptomycin         | 0.5%                 | ThermoFisher, 15140122       |
| Hoechst                         | 1:2000               | Life Technologies, H3570     |
| Calcein AM                      | 1:2000               | Invitrogen, L-3224           |
| Ethidium Homodimer              | 1:500                | Invitrogen, L-3224           |
| Mouse anti-Oct4                 | 1:100                | SCBT, sc-5279                |
| Rabbit anti-Pax6                | 1:200                | BioLegend, 901301            |
| Goat anti-OTX2                  | 1:300                | R&D, AF1979-SP               |
| Mouse anti-Nkx2.2               | 1:200                | DSHB, 74.5A5                 |
| Goat anti-Olig2                 | 1:40                 | R&D Systems, AF2418          |
| Mouse anti-Tyrosine Hydroxylase | 1:1000               | Pel-Freez, P40101-150        |
| Mouse anti-Tuj1                 | 1:1000               | Sigma, T8578-200UL           |
| Rabbit anti-Tuj1                | 1:1000               | Covance, MRB-435P            |
| Mouse anti-MBP                  | 1:1000               | BioLegend, 808401            |
| Anti PDGFR $\alpha$ -PE         | 1:5                  | BD Biosciences, 556002       |
| Anti O4-Alexa488                | 1:100                | Millipore, MAB345A4          |
| Donkey anti-Rabbit Cy3          | 1:250                | Jackson, 711-165-152         |
| Donkey anti-Rabbit 647          | 1:250                | Jackson, 711-605-152         |
| Donkey anti-Mouse 488           | 1:250                | Jackson, 711-545-152         |
| Donkey Serum                    | 5%                   | Sigma, D9663-10ML            |
| Triton X-100                    | 0.25%                | Sigma, X100-100mL            |
| Paraformaldehyde                | 4% in PBS            | SCBT, sc-281692              |
